# Supplementary material
Source: PubMed Central journal article supplement (PMC5392582)
Supplement: 10.1074_M116.761510_jbc.M116.761510-1.pdf [file 10.1074_M116.761510_jbc.M116.761510-1.pdf]

## SUPPLEMENTAL DATA

### **A Helical Bundle in the N-terminal Domain of the BLM Helicase Mediates Dimer and Potentially Hexamer Formation**

Jing Shi<sup>1</sup>, Wei-Fei Chen<sup>1</sup>, Bo Zhang<sup>1</sup>, San-Hong Fan<sup>1</sup>, Xia Ai<sup>1</sup>, Na-Nv Liu<sup>1</sup>, Stephane Rety<sup>2\*</sup> and Xu-Guang Xi<sup>1,3\*</sup>

From the <sup>1</sup>College of Life Sciences, Northwest A&F University, Yangling, Shaanxi 712100, China; <sup>2</sup>Institut de Biochimie et Chimie des Protéines, CNRS UMR 5086, 7 passage du Vercors, 69367 Lyon, France; <sup>3</sup>Laboratoire de Biologie et Pharmacologie Appliquée, ENS de Cachan, Université Paris-Saclay, Centre National de la Recherche Scientifique, 61 Avenue du Président Wilson, 94235 Cachan, France

Running title: Structures of the N-terminal DHBN domain of BLM helicases

\*To whom correspondence should be addressed. Tel: 33 01 4740 7754; Fax: 33 01 4740 7754; Email: [xxi01@ens-cachan.fr](mailto:xxi01@ens-cachan.fr) (lead contact) or/and [stephane.rety@ibcp.fr](mailto:stephane.rety@ibcp.fr)

**Keywords:** DNA helicase, genetic disease, protein self-assembly, Dimerization Helical Bundle, X-ray crystallography, Small angle X-ray scattering, enzyme kinetics

## SUPPLEMENTAL FIGURE LEGENDS

**Fig.S1 The phylogenetic tree of all BLM homologous sequences from Reference Proteomes database constructed by PhyML and rendered with evolview.** All of the conserved domains are schematically shown with different colors.

**Fig.S2 DNA steady-state fluorescence anisotropy assays of the four truncated gBLM proteins with fD20S12 substrate.** The assays were performed by Infinite F2000 instrument (TECAN). The buffer used was 20 mM Tris-HCl pH 7.5, 50 mM NaCl, 3 mM MgCl<sub>2</sub> and 1 mM DTT. 5 nM DNA substrate was incubated with each protein at different concentrations at 25 °C for 5 min, respectively. Then the data were analyzed to calculate the equilibrium dissociation constant ( $K_d$ ) as described previously (Ref 1).

SUPPLEMENTAL FIGURES

Fig.S1

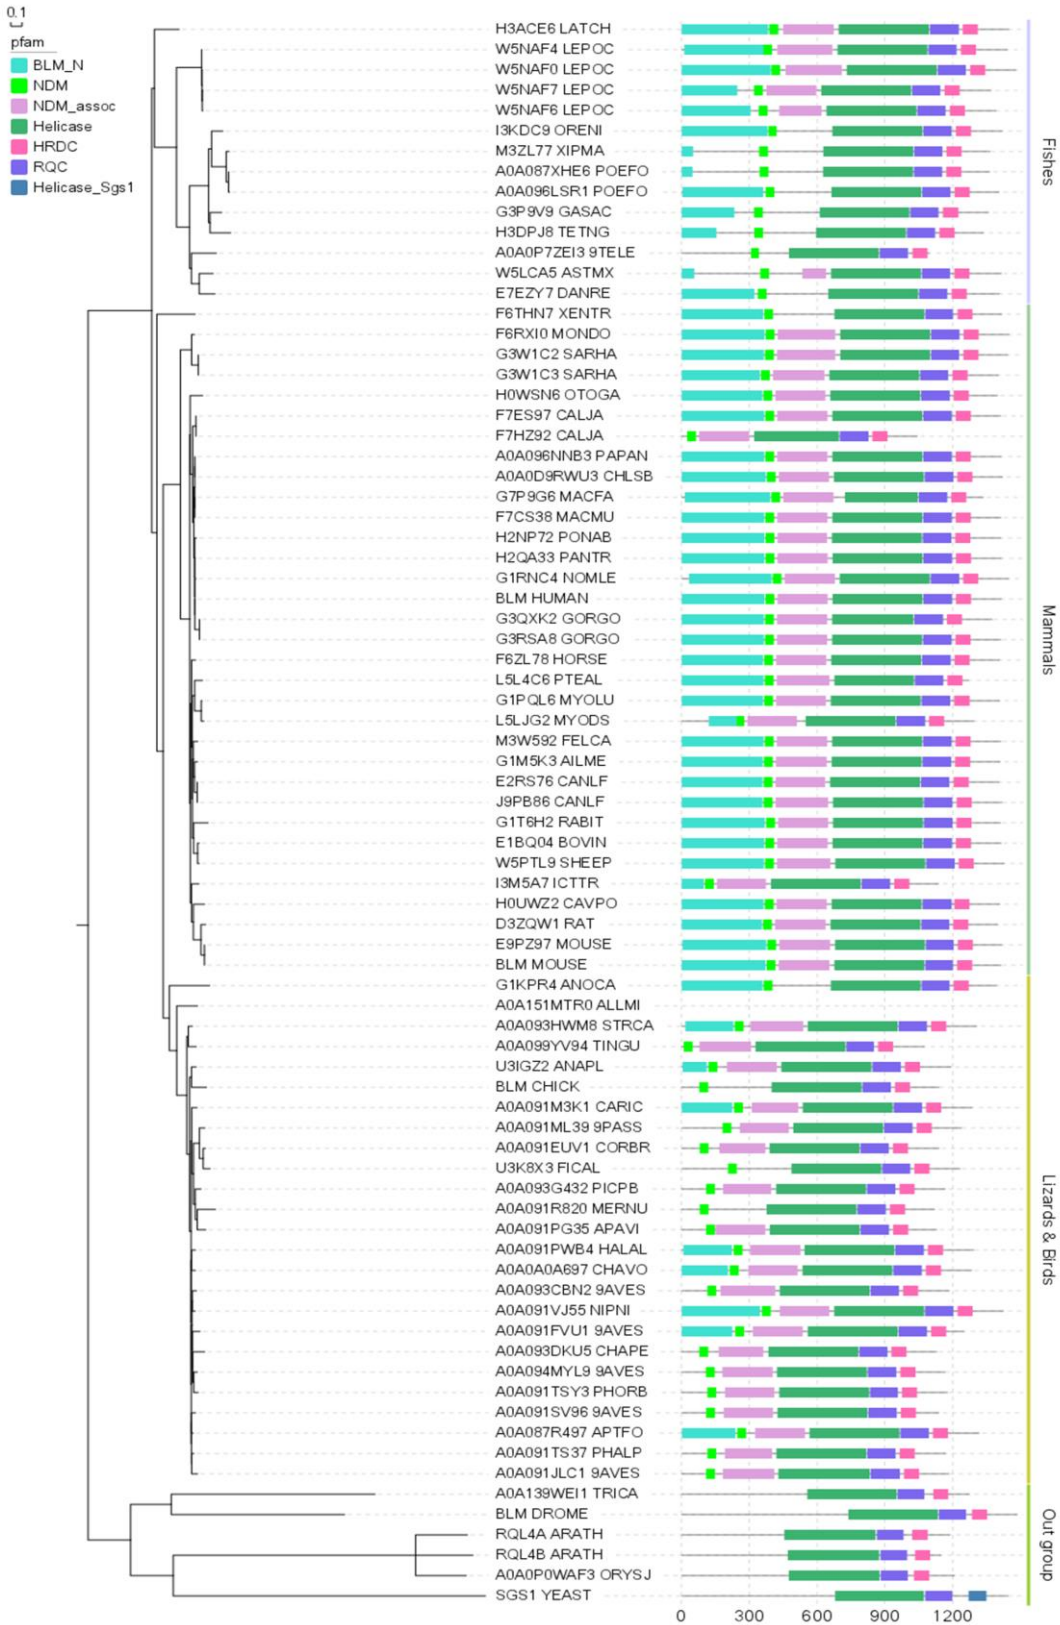

Fig.S2

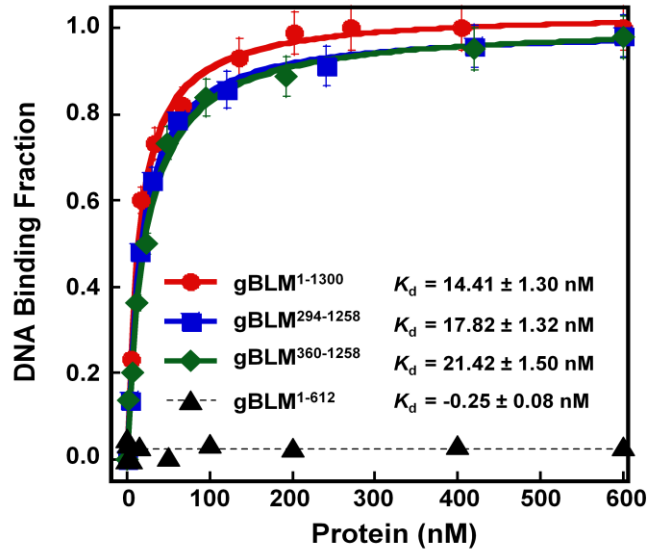

SUPPLEMENTAL TABLES

Table S1. Enzymatic activity comparisons between hBLM and gBLM.

| Protein                | ATPase                                                                               | DNA binding              | DNA unwinding                                 |
|------------------------|--------------------------------------------------------------------------------------|--------------------------|-----------------------------------------------|
| hBLM                   | $k_{cat} = 24.00 \text{ s}^{-1}$<br>$K_{ATP} = 20.80 \text{ }\mu\text{M}$<br>(Ref 2) | ----                     | $A^* \approx 0.60$<br>(EMSA assay)<br>(Ref 3) |
| gBLM <sup>1-1300</sup> | $k_{cat} = 20.10 \text{ s}^{-1}$<br>$K_{ATP} = 20.20 \text{ }\mu\text{M}$            | $K_d = 14.41 \text{ nM}$ | $A = 0.58$<br>$V^* = 0.74$                    |

\* A, amplitude; V, rate. Each data of gBLM<sup>1-1300</sup> was calculated from three independent measurements.

**Table S2. ATPase activity determination of the different gBLM deletions\*\*.**

| <b>Protein</b>           | <b><math>k_{\text{cat}}</math> (s<sup>-1</sup>)</b> | <b>K<sub>ATP</sub> (μM)</b> |
|--------------------------|-----------------------------------------------------|-----------------------------|
| gBLM <sup>1-1300</sup>   | 21.5                                                | 20.2                        |
| gBLM <sup>294-1258</sup> | 20.8                                                | 19.5                        |
| gBLM <sup>360-1258</sup> | 21.1                                                | 18.3                        |
| gBLM <sup>610-1258</sup> | 22.1                                                | 19.5                        |

\*\*ATPase activity measurements were determined under the same experimental conditions of the DNA unwinding assays.

## REFERENCES

1. Liu, N. N., Duan, X. L., Ai, X., Yang, Y. T., Li, M., Dou, S. X., Rety, S., Deprez, E., and Xi, X. G. (2015) The *Bacteroides* sp. 3\_1\_23 Pif1 protein is a multifunctional helicase. *Nucleic Acids Res* **43**, 8942-8954
2. Xu, Y. N., Bazeille, N., Ding, X. Y., Lu, X. M., Wang, P. Y., Bugnard, E., Grondin, V., Dou, S. X., and Xi, X. G. (2012) Multimeric BLM is dissociated upon ATP hydrolysis and functions as monomers in resolving DNA structures. *Nucleic Acids Res* **40**, 9802-9814
3. Cheok, C. F., Wu, L., Garcia, P. L., Janscak, P., and Hickson, I. D. (2005) The Bloom's syndrome helicase promotes the annealing of complementary single-stranded DNA. *Nucleic Acids Res* **33**, 3932-3941
